# Supplementary material for: High-throughput screening of stable sulfide semiconductors for solar cell conversion
Source: Royal Society of Chemistry journal article supplement (doi:10.1039/d4ma00029c), 2024-01-01
Supplement: d4ma00029c1.pdf [file d4ma00029c1.pdf]

## Supplementary Materials

### High-throughput screening of stable sulfide semiconductors for solar cell conversion

Jinjin Yang<sup>a</sup>, Zhongxiong Sun<sup>a</sup>, Dao-Xin Yao<sup>b</sup>, Man-Rong Li<sup>\*,a,c</sup>

<sup>a</sup> Key Laboratory of Bioinorganic and Synthetic Chemistry of Ministry of Education, School of Chemistry, Sun Yat-Sen University, Guangzhou 510006, P. R. China.

<sup>b</sup> Guangdong Key Laboratory of Magnetoelectric Physics and Devices, School of Physics, Sun Yat-Sen University, Guangzhou 510275, P. R. China

<sup>c</sup> School of Chemistry and Chemical Engineering, Hainan University, Haikou 570228, P. R. China

Email: [limanrong@mail.sysu.edu.cn](mailto:limanrong@mail.sysu.edu.cn)

#### ORCID

Jinjin Yang: [0000-0003-3085-574X](https://orcid.org/0000-0003-3085-574X)

Zhongxiong Sun: [0009-0005-7047-2649](https://orcid.org/0009-0005-7047-2649)

Dao-Xin Yao: [0000-0003-1097-3802](https://orcid.org/0000-0003-1097-3802)

Man-Rong Li: [0000-0001-8424-9134](https://orcid.org/0000-0001-8424-9134)

## Supplementary Figures

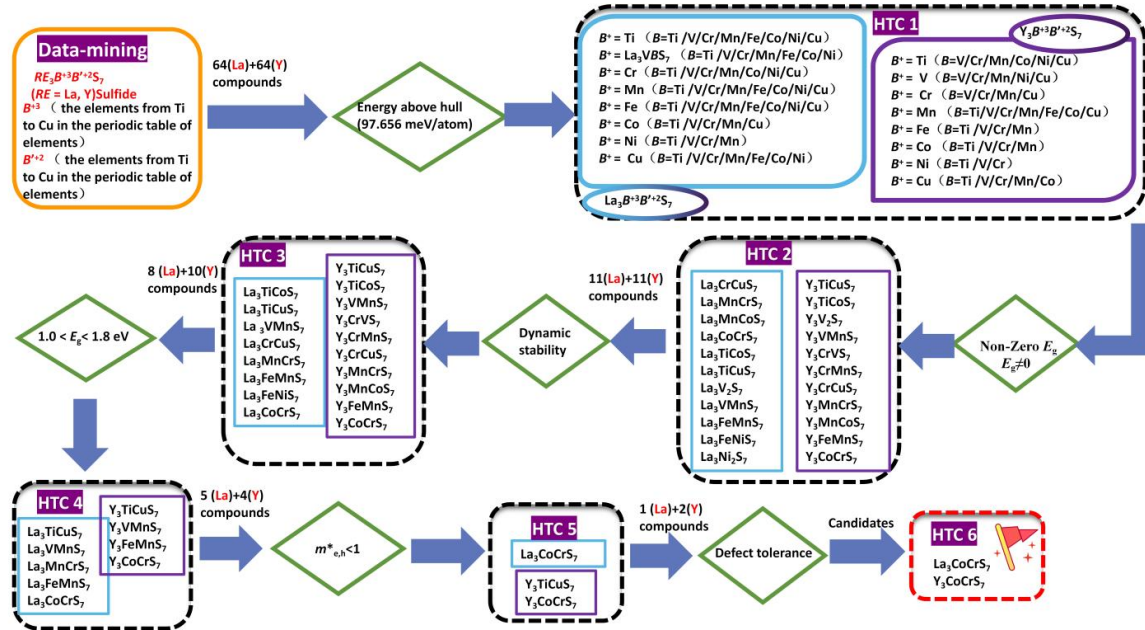

**Fig. S1** The workflows of HTC. Schematic representation of the screening process for

$RE_3BB'S_7$  ( $RE = La, Y; B/B' = Ti - Cu$ ) compounds with detailed DFT analysis.

| Space Group                                                                                                       | FM                                                                                  | AFM1                                                                                 | AFM2                                                                                  |
|-------------------------------------------------------------------------------------------------------------------|-------------------------------------------------------------------------------------|--------------------------------------------------------------------------------------|---------------------------------------------------------------------------------------|
| <p><i>C2/m</i></p> 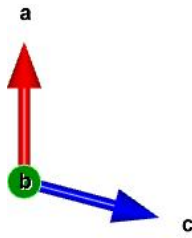              |    |    |    |
| <p><i>P2<sub>1</sub>/c</i></p>  |   |   |   |
| <p><i>Pbam</i></p>             |  |  |  |
| <p><i>Cccm</i></p>             |  |  |  |

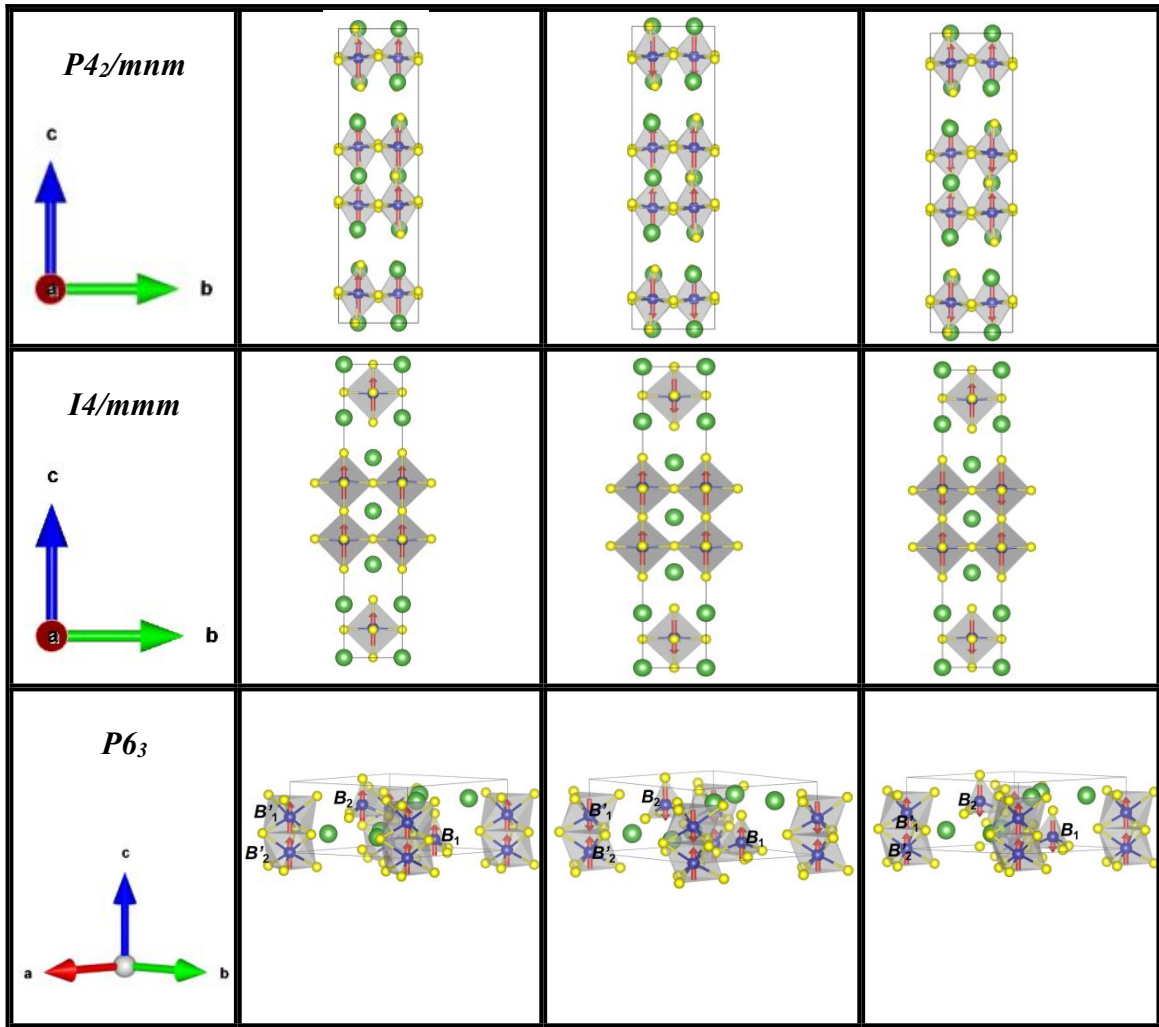

**Fig. S2** Scheme for different magnetic structures in  $A_3B_2S_7$ . The green, blue and yellow spheres represent the  $A$ ,  $B$  and sulfur atoms respectively. The spin moment is along  $[001]$  (out-of plane) direction and arrows represent the magnetic moment direction.

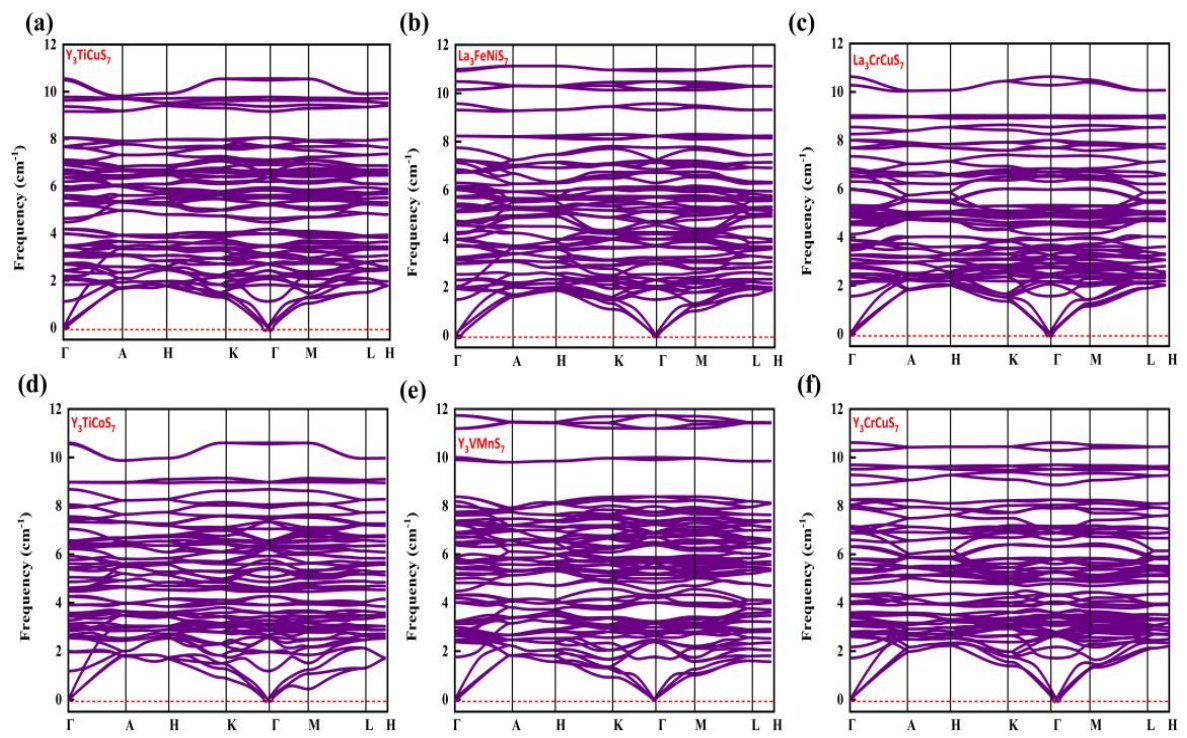

**Fig. S3** Partial phonon dispersion of selected stable partial  $A_3BB'S_7$  sulfides.

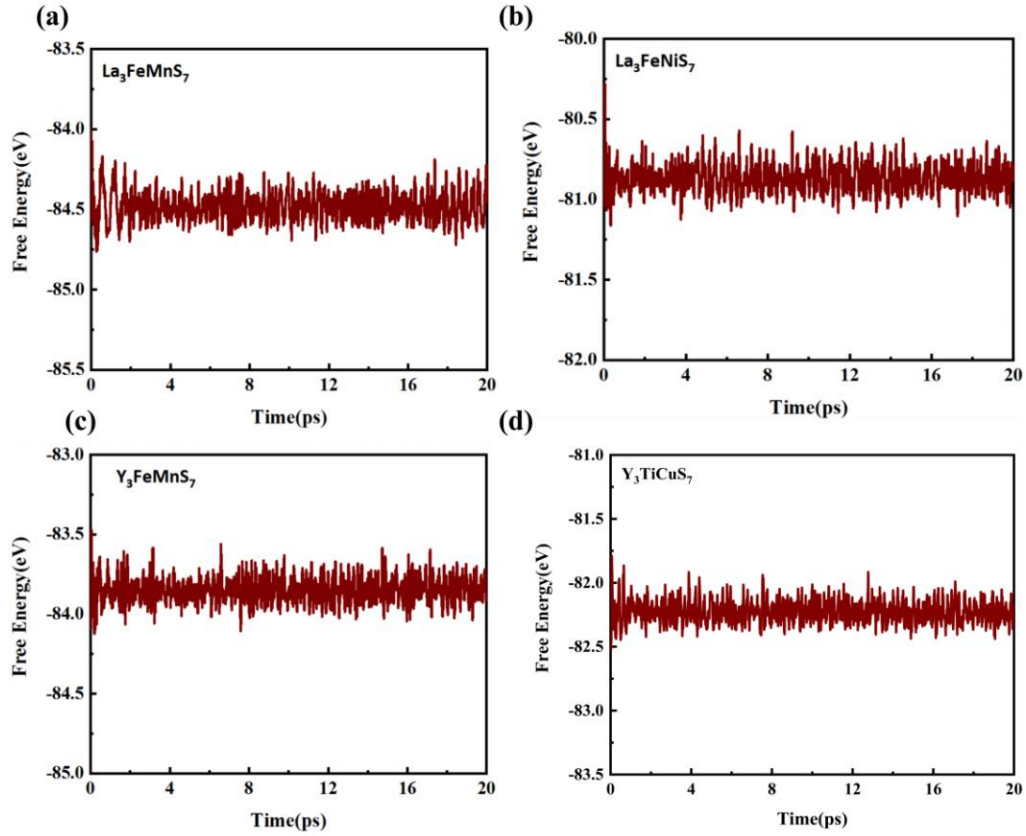

**Fig. S4** Variations of the total potential energy of partial stable  $A_3BB'S_7$  sulfides with respect to simulation time during ab initio molecular dynamics simulations.

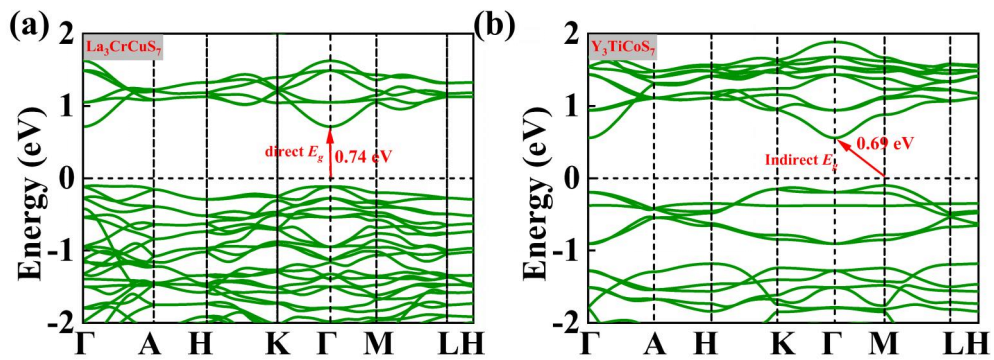

**Fig. S5** Band structure of partial stable  $A_3BB'S_7$  sulfides. The upward arrow represents direct or indirect  $E_g$ .

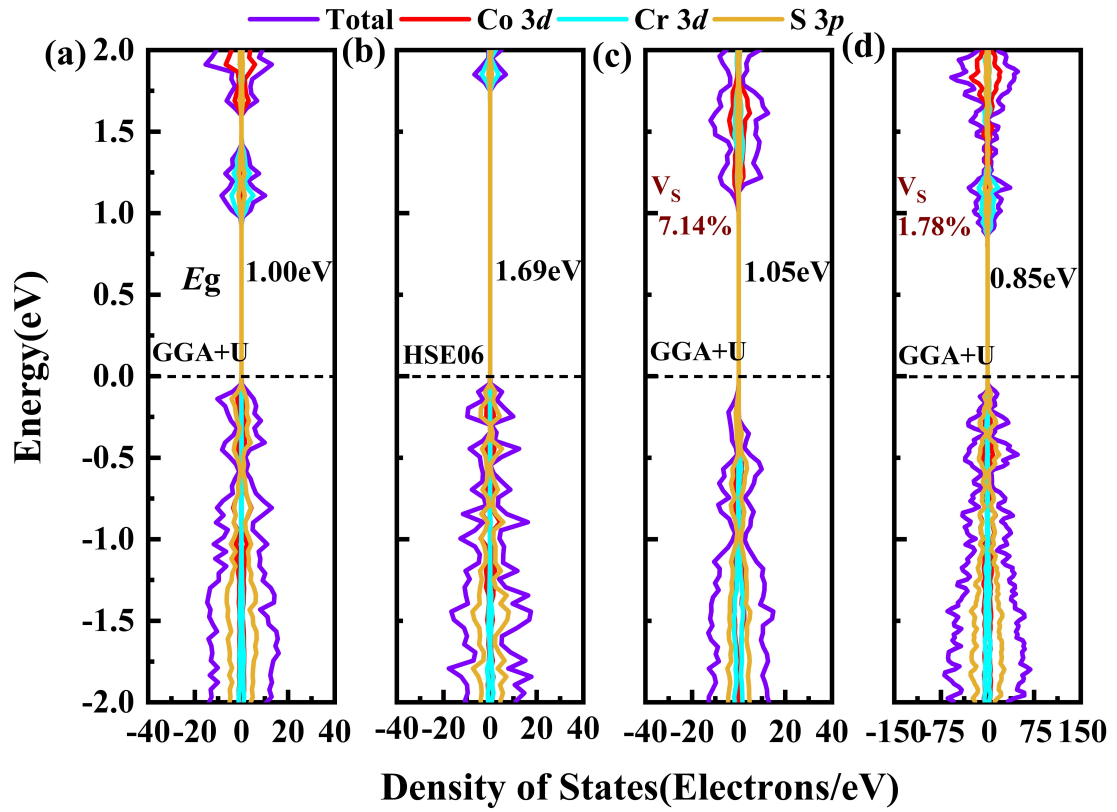

**Fig. S6** The electronic structures of  $Y_3CoCrS_7$ . Total DOSs for pristine  $Y_3CoCrS_7$  from (a) GGA+U and (b) HSE06 methods. Total DOSs for  $Y_3CoCrS_7$  with S vacancy concentration (c) 7.14% and (d) 1.78% from GGA+U method. No additional bands are produced. The zero of the energy is set at the Fermi level.

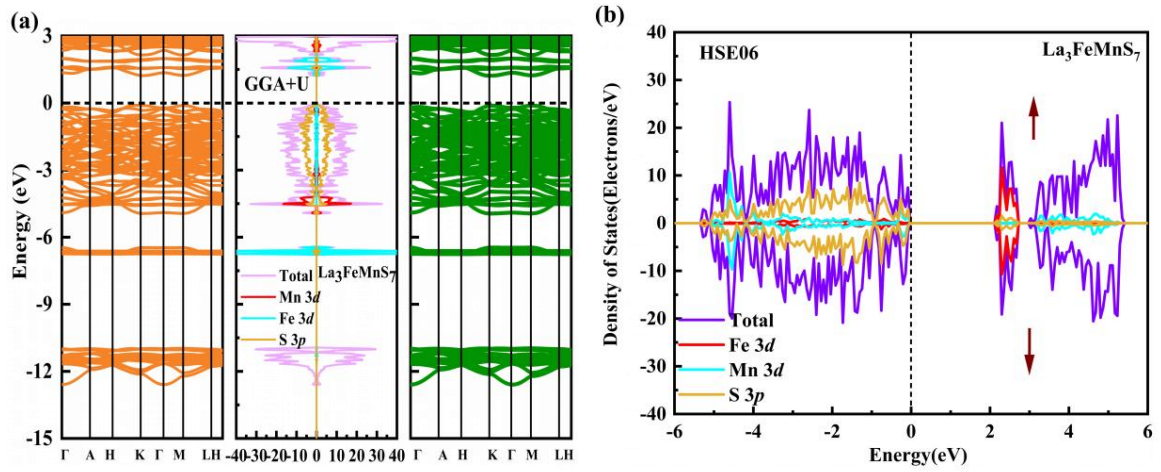

**Fig. S7** The electronic structures of  $\text{La}_3\text{FeMnS}_7$ . Total DOSs and band structure from (a) GGA+U and (b) HSE06 methods. Band structure including down-spin band (left), DOSs (middle) and up-spin band (right). The upward arrow represents the spin up, and the downward arrow means the spin down.



## Supplementary Tables

**Table S1** The corresponding lattice parameters, tolerance factors( $\tau$ ) and properties of the representative compounds with seven kinds of crystal structures in the  $A_3B_2S_7$  system. The Goldschmidt tolerance factor, which is used as a simple measure to predict tendency towards octahedral rotations, and is originally defined in terms of the ionic radii  $r$  using  $\tau = (r_A+r_S)/\sqrt{2}(r_B+r_S)$ .

| No. | Space Group | Existing Compound                              | Tolerance Factor ( $\tau$ ) | Properties      | Refs. |
|-----|-------------|------------------------------------------------|-----------------------------|-----------------|-------|
| 1   | $C2/m$      | Dy <sub>3</sub> Sc <sub>2</sub> S <sub>7</sub> | 0.8183                      |                 | 1     |
|     |             | Er <sub>3</sub> Sc <sub>2</sub> S <sub>7</sub> | 0.8197                      |                 | 1     |
|     |             | Gd <sub>3</sub> Sc <sub>2</sub> S <sub>7</sub> | 0.8348                      |                 | 1     |
|     |             | Ho <sub>3</sub> Sc <sub>2</sub> S <sub>7</sub> | 0.8238                      |                 | 1     |
|     |             | Tb <sub>3</sub> Sc <sub>2</sub> S <sub>7</sub> | 0.8293                      |                 | 1     |
| 2   | $P2_1/c$    | Ba <sub>3</sub> Sn <sub>2</sub> S <sub>7</sub> | 0.9520                      |                 | 2     |
| 3   | $Pbam$      | Eu <sub>3</sub> Sn <sub>2</sub> S <sub>7</sub> | 0.9077                      |                 | 3     |
| 4   | $Cccm$      | Ba <sub>3</sub> Zr <sub>2</sub> S <sub>7</sub> | 0.9479                      |                 | 4     |
| 5   | $P4_2/mnm$  | Ba <sub>3</sub> Zr <sub>2</sub> S <sub>7</sub> | 0.9479                      | $E_g = 1.28$ eV | 5     |
| 6   | $I4/mmm$    | Ba <sub>3</sub> Zr <sub>2</sub> S <sub>7</sub> | 0.9479                      |                 | 6     |
| 7   | $P6_3$      | La <sub>3</sub> Co <sub>2</sub> S <sub>7</sub> | 0.9803                      |                 | 7     |

|  |  |                                    |        |                                 |       |
|--|--|------------------------------------|--------|---------------------------------|-------|
|  |  | $\text{La}_3\text{FeMnS}_7$        |        | <i>p</i> -type<br>semiconductor | 8     |
|  |  | $\text{La}_3\text{Fe}_2\text{S}_7$ | 0.9277 | <i>p</i> -type<br>semiconductor | 8,9   |
|  |  | $\text{La}_3\text{FeCoS}_7$        | 0.9533 | <i>p</i> -type<br>semiconductor | 8     |
|  |  | $\text{La}_3\text{FeNiS}_7$        | 0.9492 |                                 | 8     |
|  |  | $\text{La}_3\text{FeMgS}_7$        |        | <i>p</i> -type<br>semiconductor | 8     |
|  |  | $\text{La}_3\text{FeZnS}_7$        |        | <i>p</i> -type<br>semiconductor | 8     |
|  |  | $\text{La}_3\text{MnAlS}_7$        |        | AFM                             | 8     |
|  |  | $\text{La}_3\text{FeAlS}_7$        |        | AFM                             | 8     |
|  |  | $\text{La}_3\text{CoAlS}_7$        |        | AFM                             | 8     |
|  |  | $\text{La}_3\text{AgGeS}_7$        |        |                                 | 10    |
|  |  | $\text{La}_3\text{CuGeS}_7$        |        |                                 | 11,12 |

|  |  |                                   |  |                       |       |
|--|--|-----------------------------------|--|-----------------------|-------|
|  |  | $\text{La}_3\text{CuSnS}_7$       |  |                       | 13    |
|  |  | $\text{La}_3\text{AgSiS}_7$       |  |                       | 14    |
|  |  | $\text{La}_3\text{AgSnS}_7$       |  |                       | 15    |
|  |  | $\text{La}_3\text{FeGaS}_7$       |  |                       | 16    |
|  |  | $\text{La}_3\text{CoGaS}_7$       |  |                       | 16    |
|  |  | $\text{La}_3\text{CuGaS}_7$       |  |                       | 17    |
|  |  | $\text{La}_3\text{FeInS}_7$       |  | AFM $T_N = 30$ K      | 18    |
|  |  | $\text{La}_3\text{CoInS}_7$       |  |                       | 18    |
|  |  | $\text{La}_3\text{NiInS}_7$       |  |                       | 18    |
|  |  | $\text{U}_3\text{Cu}_2\text{S}_7$ |  | Paramagnetism<br>(PM) | 19    |
|  |  | $\text{Y}_3\text{CuSnS}_7$        |  |                       | 20    |
|  |  | $\text{Y}_3\text{CuSiS}_7$        |  |                       | 12,21 |
|  |  | $\text{Y}_3\text{CoGaS}_7$        |  |                       |       |
|  |  | $\text{Y}_3\text{CuGeS}_7$        |  |                       | 22    |
|  |  | $\text{Y}_3\text{NaSiS}_7$        |  |                       | 23    |
|  |  | $\text{Ce}_3\text{CuGeS}_7$       |  |                       | 24    |
|  |  | $\text{Pr}_3\text{CuGeS}_7$       |  |                       | 24    |
|  |  | $\text{Nd}_3\text{CuGeS}_7$       |  |                       | 24    |

|  |  |                             |  |  |       |
|--|--|-----------------------------|--|--|-------|
|  |  | $\text{Sm}_3\text{CuGeS}_7$ |  |  | 24,25 |
|  |  | $\text{Gd}_3\text{CuGeS}_7$ |  |  | 24    |
|  |  | $\text{Tb}_3\text{CuGeS}_7$ |  |  | 24    |
|  |  | $\text{Dy}_3\text{CuGeS}_7$ |  |  | 12,24 |
|  |  | $\text{Er}_3\text{CuGeS}_7$ |  |  | 24    |
|  |  | $\text{Ho}_3\text{CuGeS}_7$ |  |  | 26    |
|  |  | $\text{Ce}_3\text{CuSnS}_7$ |  |  | 13    |
|  |  | $\text{Pr}_3\text{CuSnS}_7$ |  |  | 13    |
|  |  | $\text{Nd}_3\text{CuSnS}_7$ |  |  | 13    |
|  |  | $\text{Sm}_3\text{CuSnS}_7$ |  |  | 13    |
|  |  | $\text{Gd}_3\text{CuSnS}_7$ |  |  | 13    |
|  |  | $\text{Tb}_3\text{CuSnS}_7$ |  |  | 13    |
|  |  | $\text{Dy}_3\text{CuSnS}_7$ |  |  | 13    |
|  |  | $\text{Er}_3\text{CuSnS}_7$ |  |  | 13    |
|  |  | $\text{Ce}_3\text{CuSiS}_7$ |  |  | 27,28 |
|  |  | $\text{Pr}_3\text{CuSiS}_7$ |  |  | 27    |
|  |  | $\text{Nd}_3\text{CuSiS}_7$ |  |  | 27    |
|  |  | $\text{Sm}_3\text{CuSiS}_7$ |  |  | 27    |
|  |  | $\text{Gd}_3\text{CuSiS}_7$ |  |  | 27,29 |
|  |  | $\text{Tb}_3\text{CuSiS}_7$ |  |  | 27    |

|  |  |                                    |  |                  |       |
|--|--|------------------------------------|--|------------------|-------|
|  |  | Dy <sub>3</sub> CuSiS <sub>7</sub> |  |                  | 27    |
|  |  | Er <sub>3</sub> CuSiS <sub>7</sub> |  |                  | 27    |
|  |  | Ho <sub>3</sub> CuSiS <sub>7</sub> |  |                  | 12,26 |
|  |  | Ce <sub>3</sub> FeGaS <sub>7</sub> |  |                  | 16    |
|  |  | Pr <sub>3</sub> FeGaS <sub>7</sub> |  | PM               | 16    |
|  |  | Nd <sub>3</sub> FeGaS <sub>7</sub> |  | PM               | 16    |
|  |  | Tb <sub>3</sub> FeGeS <sub>7</sub> |  | AFM $T_N = 15$ K | 16    |
|  |  | Sm <sub>3</sub> FeGeS <sub>7</sub> |  |                  | 16    |
|  |  | Gd <sub>3</sub> FeGeS <sub>7</sub> |  | PM               | 16    |
|  |  | Ce <sub>3</sub> CoGaS <sub>7</sub> |  |                  | 16    |
|  |  | Pr <sub>3</sub> CoGaS <sub>7</sub> |  | AFM $T_N < 2$ K  | 16    |
|  |  | Nd <sub>3</sub> CoGaS <sub>7</sub> |  | PM               | 16    |
|  |  | Tb <sub>3</sub> CoGeS <sub>7</sub> |  | AFM $T_N = 3$ K  | 16    |
|  |  | Sm <sub>3</sub> CoGeS <sub>7</sub> |  |                  | 16    |
|  |  | Gd <sub>3</sub> CoGeS <sub>7</sub> |  | PM               | 16    |
|  |  | Dy <sub>3</sub> CoGaS <sub>7</sub> |  | AFM $T_N = 2$ K  | 16    |
|  |  | Ho <sub>3</sub> CoGaS <sub>7</sub> |  | PM               | 16    |
|  |  | Er <sub>3</sub> CoGaS <sub>7</sub> |  | AFM $T_N = 3$ K  | 16    |
|  |  | Ce <sub>3</sub> NiGaS <sub>7</sub> |  | PM               | 16    |
|  |  | Tb <sub>3</sub> NiGaS <sub>7</sub> |  | PM               | 16    |

|  |  |                             |  |  |    |
|--|--|-----------------------------|--|--|----|
|  |  | $\text{Ce}_3\text{CuGaS}_7$ |  |  | 17 |
|  |  | $\text{Pr}_3\text{CuGaS}_7$ |  |  | 17 |
|  |  | $\text{Nd}_3\text{CuGaS}_7$ |  |  | 17 |
|  |  | $\text{Yb}_3\text{NaGeS}_7$ |  |  | 30 |
|  |  | $\text{Sm}_3\text{NaGeS}_7$ |  |  | 30 |
|  |  | $\text{Nd}_3\text{NaGeS}_7$ |  |  | 30 |
|  |  | $\text{Gd}_3\text{NaGeS}_7$ |  |  | 30 |
|  |  | $\text{Ce}_3\text{NaGeS}_7$ |  |  | 30 |
|  |  | $\text{Ce}_3\text{AgGeS}_7$ |  |  | 12 |
|  |  | $\text{Pr}_3\text{AgGeS}_7$ |  |  | 12 |

**Table S2** Structural optimization energy (eV) of  $\text{La}_3\text{B}_2\text{S}_7$  ( $B = \text{Ti} - \text{Cu}$ ). The lowest energy of each compound is in red. "-" represents the case of non-convergence, and the corresponding magnetic structure is abandoned.

|                                                      |      | $C2/m$   | $P2_1/c$ | $Pbam$          | $Cccm$   | $P4_2/mnm$ | $I4/mmm$ | $P6_3$          |
|------------------------------------------------------|------|----------|----------|-----------------|----------|------------|----------|-----------------|
| <b><math>\text{La}_3\text{Ti}_2\text{S}_7</math></b> | FM   | -79.0028 | -80.9655 | -81.5642        | -80.5690 | -81.1527   | -80.5422 | -81.4493        |
|                                                      | AFM1 | -78.8786 | -80.9652 | <b>-81.5824</b> | -80.5693 | -81.1529   | -80.5422 | -81.3941        |
|                                                      | AFM2 | -78.8796 | -        | -81.5059        | -80.5692 | -81.1522   | -80.5418 | -81.4167        |
| <b><math>\text{La}_3\text{V}_2\text{S}_7</math></b>  | FM   | -79.1007 | -81.1459 | -81.8160        | -80.7491 | -81.5608   | -80.7382 | -81.9907        |
|                                                      | AFM1 | -79.1046 | -81.0816 | -81.7866        | -80.7756 | -81.5597   | -80.7670 | -82.0120        |
|                                                      | AFM2 | -79.0845 | -81.1412 | -81.8428        | -80.7868 | -81.5718   | -80.7677 | <b>-82.1145</b> |
| <b><math>\text{La}_3\text{Cr}_2\text{S}_7</math></b> | FM   | -79.0537 | -81.2477 | -82.0815        | -81.1372 | -81.8166   | -81.1286 | -81.5264        |
|                                                      | AFM1 | -79.0869 | -81.2465 | -82.0779        | -81.1442 | -81.8180   | -81.1266 | -81.5490        |
|                                                      | AFM2 | -79.0886 | -81.2300 | <b>-82.1480</b> | -81.1445 | -81.7880   | -81.1254 | -81.6253        |
| <b><math>\text{La}_3\text{Mn}_2\text{S}_7</math></b> | FM   | -78.1689 | -80.6067 | -81.1291        | -79.9878 | -80.5212   | -79.9991 | -80.8442        |
|                                                      | AFM1 | -78.2732 | -78.3865 | <b>-81.1561</b> | -79.8404 | -80.5285   | -79.9965 | -80.8225        |
|                                                      | AFM2 | -78.2686 | -        | -80.9106        | -79.8493 | -80.5255   | -79.8474 | -80.8491        |
| <b><math>\text{La}_3\text{Fe}_2\text{S}_7</math></b> | FM   | -75.0625 | -76.7535 | -78.0753        | -77.2203 | -77.4800   | -77.2263 | -78.2612        |
|                                                      | AFM1 | -75.1299 | -76.7459 | -78.1250        | -77.1592 | -77.4828   | -77.2347 | -78.2729        |
|                                                      | AFM2 | -        | -76.7509 | -77.9881        | -77.1704 | -77.4794   | -77.1835 | <b>-78.2733</b> |
| <b><math>\text{La}_3\text{Co}_2\text{S}_7</math></b> | FM   | -71.6212 | -74.4072 | -74.9871        | -74.6749 | -74.6610   | -74.6956 | -75.1126        |
|                                                      | AFM1 | -71.7118 | -74.5405 | -74.9742        | -74.6737 | -74.6599   | -74.6964 | -75.1125        |
|                                                      | AFM2 | -71.7111 | -74.4573 | -74.9752        | -74.6752 | -74.6613   | -74.6960 | <b>-75.1212</b> |
| <b><math>\text{La}_3\text{Ni}_2\text{S}_7</math></b> | FM   | -68.9322 | -71.7056 | -72.4252        | -72.2185 | -72.2832   | -72.2832 | -71.9069        |
|                                                      | AFM1 | -68.9328 | -71.7035 | -72.4252        | -72.2185 | -72.2816   | -72.2816 | -71.9783        |
|                                                      | AFM2 | -        | -71.7045 | <b>-72.4259</b> | -72.2185 | -72.2821   | -72.2821 | -72.0952        |
| <b><math>\text{La}_3\text{Cu}_2\text{S}_7</math></b> | FM   | -65.0876 | -67.8474 | -68.3434        | -67.6337 | -67.8139   | -67.6447 | -67.7898        |
|                                                      | AFM1 | -65.0713 | -67.8423 | <b>-68.3452</b> | -67.6321 | -67.8134   | -67.6447 | -67.7908        |
|                                                      | AFM2 | -        | -67.8384 | -68.3437        | -67.6392 | -67.8125   | -67.6453 | -67.7908        |

**Table S3** Thermodynamic screening details of  $\text{La}_3\text{BB}'\text{S}_7$  ( $B/B' = \text{Ti-Cu}$ ) by  $E_{\text{hull}}$ (meV/atom). The material project IDs (mp-number) of the compounds on the convex hull are marked in the parentheses.

| Compounds                   | Space group | Magnetic ground state | Compounds on the convex hull                                                                              | $E_{\text{hull}}$ (meV/atom) |
|-----------------------------|-------------|-----------------------|-----------------------------------------------------------------------------------------------------------|------------------------------|
| $\text{La}_3\text{TiTiS}_7$ | $P6_{3m}$   | AFM1                  | $\text{La}_2\text{S}_3$ (mp-7475)+<br>$\text{Ti}_2\text{S}_3$ (mp-1101099) +<br>$\text{TiS}$ (mp-1018028) | 72.4041                      |
| $\text{La}_3\text{TiVS}_7$  | $P6_3$      | AFM2                  | $\text{La}_2\text{S}_3 + \text{Ti}_2\text{S}_3 +$<br>$\text{VS}$ (mp-1868)                                | 52.4691                      |
| $\text{La}_3\text{TiCrS}_7$ | $P6_3$      | AFM2                  | $\text{La}_2\text{S}_3 + \text{Ti}_2\text{S}_3 +$<br>$\text{CrS}$ (mp-523)                                | 53.2071                      |
| $\text{La}_3\text{TiMnS}_7$ | $P6_3$      | AFM2                  | $\text{La}_2\text{S}_3 + \text{Ti}_2\text{S}_3 +$<br>$\text{MnS}$ (mp-2065)                               | 36.1407                      |
| $\text{La}_3\text{TiFeS}_7$ | $P6_3$      | AFM1                  | $\text{La}_2\text{S}_3 + \text{Ti}_2\text{S}_3 +$<br>$\text{FeS}$ (mp-505531)                             | 75.5514                      |
| $\text{La}_3\text{TiCoS}_7$ | $P6_3$      | AFM2                  | $\text{La}_2\text{S}_3 + \text{Ti}_2\text{S}_3 +$<br>$\text{CoS}$ (mp-1147746)                            | 56.2159                      |
| $\text{La}_3\text{TiNiS}_7$ | $P6_3$      | AFM1                  | $\text{La}_2\text{S}_3 + \text{Ti}_2\text{S}_3 +$<br>$\text{NiS}$ (mp-1547)                               | 22.5923                      |
| $\text{La}_3\text{TiCuS}_7$ | $P6_3$      | AFM2                  | $\text{La}_2\text{S}_3 + \text{Ti}_2\text{S}_3 +$<br>$\text{CuS}$ (mp-555599)                             | -53.8920                     |
| $\text{La}_3\text{VTiS}_7$  | $P6_3$      | FM                    | $\text{La}_2\text{S}_3 + \text{V}_3\text{S}_4$ (mp-799) +<br>$\text{VS}_2$ (mp-1013525)+ $\text{TiS}$     | 79.6366                      |
| $\text{La}_3\text{VVS}_7$   | $P6_3$      | AFM2                  | $\text{La}_2\text{S}_3 + \text{V}_3\text{S}_4 + \text{VS}_2 + \text{VS}$                                  | 39.0360                      |
| $\text{La}_3\text{VCrS}_7$  | $P6_3$      | AFM1                  | $\text{La}_2\text{S}_3 + \text{V}_3\text{S}_4 + \text{VS}_2 +$<br>$\text{CrS}$                            | 44.3347                      |
| $\text{La}_3\text{VMnS}_7$  | $P6_3$      | AFM2                  | $\text{La}_2\text{S}_3 + \text{V}_3\text{S}_4 + \text{VS}_2 +$<br>$\text{MnS}$                            | 23.7688                      |



|                                    |                       |      |                                                                                        |          |
|------------------------------------|-----------------------|------|----------------------------------------------------------------------------------------|----------|
| La <sub>3</sub> VFeS <sub>7</sub>  | <i>P6<sub>3</sub></i> | AFM2 | La <sub>2</sub> S <sub>3</sub> + V <sub>3</sub> S <sub>4</sub> + VS <sub>2</sub> + FeS | 99.8159  |
| La <sub>3</sub> VCoS <sub>7</sub>  | <i>P6<sub>3</sub></i> | AFM1 | La <sub>2</sub> S <sub>3</sub> + V <sub>3</sub> S <sub>4</sub> + VS <sub>2</sub> + CoS | 83.3718  |
| La <sub>3</sub> VNiS <sub>7</sub>  | <i>P6<sub>3</sub></i> | AFM2 | La <sub>2</sub> S <sub>3</sub> + V <sub>3</sub> S <sub>4</sub> + VS <sub>2</sub> + NiS | 50.4504  |
| La <sub>3</sub> VCuS <sub>7</sub>  | <i>P6<sub>3</sub></i> | AFM1 | La <sub>2</sub> S <sub>3</sub> + V <sub>3</sub> S <sub>4</sub> + VS <sub>2</sub> + CuS | -13.8973 |
| La <sub>3</sub> CrTiS <sub>7</sub> | <i>P6<sub>3</sub></i> | AFM2 | La <sub>2</sub> S <sub>3</sub> + Cr <sub>2</sub> S <sub>3</sub> + TiS                  | 84.9772  |
| La <sub>3</sub> CrVS <sub>7</sub>  | <i>P6<sub>3</sub></i> | AFM2 | La <sub>2</sub> S <sub>3</sub> + Cr <sub>2</sub> S <sub>3</sub> + VS                   | 52.6952  |
| La <sub>3</sub> CrCrS <sub>7</sub> | <i>Pbam</i>           | AFM2 | La <sub>2</sub> S <sub>3</sub> + Cr <sub>2</sub> S <sub>3</sub> (mp-555569) + CrS      | 1.9465   |
| La <sub>3</sub> CrMnS <sub>7</sub> | <i>P6<sub>3</sub></i> | FM   | La <sub>2</sub> S <sub>3</sub> + Cr <sub>2</sub> S <sub>3</sub> + MnS                  | 55.0713  |
| La <sub>3</sub> CrFeS <sub>7</sub> | <i>P6<sub>3</sub></i> | AFM2 | La <sub>2</sub> S <sub>3</sub> + Cr <sub>2</sub> S <sub>3</sub> + FeS                  | 114.0645 |
| La <sub>3</sub> CrCoS <sub>7</sub> | <i>P6<sub>3</sub></i> | FM   | La <sub>2</sub> S <sub>3</sub> + Cr <sub>2</sub> S <sub>3</sub> + CoS                  | 95.1014  |
| La <sub>3</sub> CrNiS <sub>7</sub> | <i>P6<sub>3</sub></i> | AFM1 | La <sub>2</sub> S <sub>3</sub> + Cr <sub>2</sub> S <sub>3</sub> + NiS                  | 67.5784  |
| La <sub>3</sub> CrCuS <sub>7</sub> | <i>P6<sub>3</sub></i> | FM   | La <sub>2</sub> S <sub>3</sub> + Cr <sub>2</sub> S <sub>3</sub> + CuS                  | -4.8341  |
| La <sub>3</sub> MnTiS <sub>7</sub> | <i>P6<sub>3</sub></i> | AFM2 | La <sub>2</sub> S <sub>3</sub> + Mn <sub>2</sub> S <sub>3</sub> (mp-974355) + TiS      | -4.1385  |
| La <sub>3</sub> MnVS <sub>7</sub>  | <i>P6<sub>3</sub></i> | FM   | La <sub>2</sub> S <sub>3</sub> + Mn <sub>2</sub> S <sub>3</sub> + VS                   | -11.5494 |
| La <sub>3</sub> MnCrS <sub>7</sub> | <i>P6<sub>3</sub></i> | AFM2 | La <sub>2</sub> S <sub>3</sub> + Mn <sub>2</sub> S <sub>3</sub> + CrS                  | -49.6299 |
| La <sub>3</sub> MnMnS <sub>7</sub> | <i>Pbam</i>           | AFM1 | La <sub>2</sub> S <sub>3</sub> + Mn <sub>2</sub> S <sub>3</sub> + MnS                  | -25.2089 |
| La <sub>3</sub> MnFeS <sub>7</sub> | <i>P6<sub>3</sub></i> | AFM2 | La <sub>2</sub> S <sub>3</sub> + Mn <sub>2</sub> S <sub>3</sub> + FeS                  | 71.5976  |
| La <sub>3</sub> MnCoS <sub>7</sub> | <i>P6<sub>3</sub></i> | AFM2 | La <sub>2</sub> S <sub>3</sub> + Mn <sub>2</sub> S <sub>3</sub> + CoS                  | 50.7170  |
| La <sub>3</sub> MnNiS <sub>7</sub> | <i>P6<sub>3</sub></i> | AFM1 | La <sub>2</sub> S <sub>3</sub> + Mn <sub>2</sub> S <sub>3</sub> + NiS                  | 62.4652  |

---

|                             |        |      |                                                                                                       |          |
|-----------------------------|--------|------|-------------------------------------------------------------------------------------------------------|----------|
| $\text{La}_3\text{MnCuS}_7$ | $P6_3$ | AFM1 | $\text{La}_2\text{S}_3 + \text{Mn}_2\text{S}_3 + \text{CuS}$                                          | 4.7039   |
| $\text{La}_3\text{FeTiS}_7$ | $P6_3$ | FM   | $\text{La}_2\text{S}_3 + \text{FeS}_2 + \text{FeS} + \text{TiS}$                                      | 46.5559  |
| $\text{La}_3\text{FeVS}_7$  | $P6_3$ | AFM2 | $\text{La}_2\text{S}_3 + \text{FeS}_2 + \text{FeS} + \text{VS}$                                       | 23.6156  |
| $\text{La}_3\text{FeCrS}_7$ | $P6_3$ | AFM2 | $\text{La}_2\text{S}_3 + \text{FeS}_2 + \text{FeS} + \text{CrS}$                                      | 11.1703  |
| $\text{La}_3\text{FeMnS}_7$ | $P6_3$ | AFM2 | $\text{La}_2\text{S}_3 + \text{FeS}_2 + \text{FeS} + \text{MnS}$                                      | 13.2033  |
| $\text{La}_3\text{FeFeS}_7$ | $P6_3$ | AFM2 | $\text{La}_2\text{S}_3 + \text{FeS}_2 (\text{mp-1522}) + \text{FeS}$                                  | 97.6561  |
| $\text{La}_3\text{FeCoS}_7$ | $P6_3$ | AFM1 | $\text{La}_2\text{S}_3 + \text{FeS}_2 + \text{FeS} + \text{CoS}$                                      | 95.6875  |
| $\text{La}_3\text{FeNiS}_7$ | $P6_3$ | AFM2 | $\text{La}_2\text{S}_3 + \text{FeS}_2 + \text{FeS} + \text{NiS}$                                      | 71.2535  |
| $\text{La}_3\text{FeCuS}_7$ | $P6_3$ | AFM1 | $\text{La}_2\text{S}_3 + \text{FeS}_2 + \text{FeS} + \text{CuS}$                                      | 70.7724  |
| $\text{La}_3\text{CoTiS}_7$ | $P6_3$ | AFM1 | $\text{La}_2\text{S}_3 + \text{Co}_2\text{S}_3 (\text{mp-1183728}) + \text{TiS}$                      | 38.4629  |
| $\text{La}_3\text{CoVS}_7$  | $P6_3$ | AFM1 | $\text{La}_2\text{S}_3 + \text{Co}_2\text{S}_3 + \text{VS}$                                           | 33.2514  |
| $\text{La}_3\text{CoCrS}_7$ | $P6_3$ | AFM2 | $\text{La}_2\text{S}_3 + \text{Co}_2\text{S}_3 + \text{CrS}$                                          | -2.1264  |
| $\text{La}_3\text{CoMnS}_7$ | $P6_3$ | AFM2 | $\text{La}_2\text{S}_3 + \text{Co}_2\text{S}_3 + \text{MnS}$                                          | 44.4441  |
| $\text{La}_3\text{CoFeS}_7$ | $P6_3$ | FM   | $\text{La}_2\text{S}_3 + \text{Co}_2\text{S}_3 + \text{FeS}$                                          | 109.7625 |
| $\text{La}_3\text{CoCoS}_7$ | $P6_3$ | AFM2 | $\text{La}_2\text{S}_3 + \text{Co}_2\text{S}_3 + \text{CoS}$                                          | 98.0343  |
| $\text{La}_3\text{CoNiS}_7$ | $P6_3$ | AFM2 | $\text{La}_2\text{S}_3 + \text{Co}_2\text{S}_3 + \text{NiS}$                                          | 106.1718 |
| $\text{La}_3\text{CoCuS}_7$ | $P6_3$ | AFM2 | $\text{La}_2\text{S}_3 + \text{Co}_2\text{S}_3 + \text{CuS}$                                          | 86.2314  |
| $\text{La}_3\text{NiTiS}_7$ | $P6_3$ | AFM1 | $\text{La}_2\text{S}_3 + \text{Ni}_3\text{S}_4 (\text{mp-1050}) + \text{NiS}_2 (\text{mp-1180046}) +$ | 38.7534  |

|                                    |                       |      | TiS                                                                                      |          |
|------------------------------------|-----------------------|------|------------------------------------------------------------------------------------------|----------|
| La <sub>3</sub> NiVS <sub>7</sub>  | <i>P6<sub>3</sub></i> | AFM1 | La <sub>2</sub> S <sub>3</sub> + Ni <sub>3</sub> S <sub>4</sub> + NiS <sub>2</sub> + VS  | 38.4501  |
| La <sub>3</sub> NiCrS <sub>7</sub> | <i>P6<sub>3</sub></i> | AFM2 | La <sub>2</sub> S <sub>3</sub> + Ni <sub>3</sub> S <sub>4</sub> + NiS <sub>2</sub> + CrS | 11.4520  |
| La <sub>3</sub> NiMnS <sub>7</sub> | <i>P6<sub>3</sub></i> | AFM2 | La <sub>2</sub> S <sub>3</sub> + Ni <sub>3</sub> S <sub>4</sub> + NiS <sub>2</sub> + MnS | 45.0506  |
| La <sub>3</sub> NiFeS <sub>7</sub> | <i>P6<sub>3</sub></i> | FM   | La <sub>2</sub> S <sub>3</sub> + Ni <sub>3</sub> S <sub>4</sub> + NiS <sub>2</sub> + NiS | 113.4404 |
| La <sub>3</sub> NiCoS <sub>7</sub> | <i>P6<sub>3</sub></i> | FM   | La <sub>2</sub> S <sub>3</sub> + Ni <sub>3</sub> S <sub>4</sub> + NiS <sub>2</sub> + CoS | 105.3345 |
| La <sub>3</sub> NiNiS <sub>7</sub> | <i>Pbam</i>           | AFM2 | La <sub>2</sub> S <sub>3</sub> + Ni <sub>3</sub> S <sub>4</sub> + NiS <sub>2</sub> + NiS | 75.7763  |
| La <sub>3</sub> NiCuS <sub>7</sub> | <i>P6<sub>3</sub></i> | AFM2 | La <sub>2</sub> S <sub>3</sub> + Ni <sub>3</sub> S <sub>4</sub> + NiS <sub>2</sub> + CuS | 114.4140 |
| La <sub>3</sub> CuTiS <sub>7</sub> | <i>P6<sub>3</sub></i> | AFM2 | La <sub>2</sub> S <sub>3</sub> + LaCuS <sub>2</sub> (mp-4841) + CuS <sub>2</sub> + TiS   | -15.4209 |
| La <sub>3</sub> CuVS <sub>7</sub>  | <i>P6<sub>3</sub></i> | AFM1 | La <sub>2</sub> S <sub>3</sub> + CuS <sub>2</sub> + LaCuS <sub>2</sub> + VS              | 4.2010   |
| La <sub>3</sub> CuCrS <sub>7</sub> | <i>P6<sub>3</sub></i> | AFM2 | La <sub>2</sub> S <sub>3</sub> + CuS <sub>2</sub> + LaCuS <sub>2</sub> + CrS             | -29.7537 |
| La <sub>3</sub> CuMnS <sub>7</sub> | <i>P6<sub>3</sub></i> | AFM2 | La <sub>2</sub> S <sub>3</sub> + CuS <sub>2</sub> + LaCuS <sub>2</sub> + MnS             | 14.6570  |
| La <sub>3</sub> CuFeS <sub>7</sub> | <i>P6<sub>3</sub></i> | AFM1 | La <sub>2</sub> S <sub>3</sub> + CuS <sub>2</sub> + LaCuS <sub>2</sub> + FeS             | 81.4995  |
| La <sub>3</sub> CuCoS <sub>7</sub> | <i>P6<sub>3</sub></i> | FM   | La <sub>2</sub> S <sub>3</sub> + CuS <sub>2</sub> + LaCuS <sub>2</sub> + CoS             | 69.3299  |
| La <sub>3</sub> CuNiS <sub>7</sub> | <i>P6<sub>3</sub></i> | AFM1 | La <sub>2</sub> S <sub>3</sub> + CuS <sub>2</sub> + LaCuS <sub>2</sub> + NiS             | 93.3187  |
| La <sub>3</sub> CuCuS <sub>7</sub> | <i>Pbam</i>           | AFM1 | La <sub>2</sub> S <sub>3</sub> + CuS <sub>2</sub> + LaCuS <sub>2</sub> + CuS             | 65.1781  |

---

**Table S4** Thermodynamic screening details of  $Y_3BB'S_7$  ( $B/B' = \text{Ti-Cu}$ ) by  $E_{\text{hull}}$  (meV/atom). The material project IDs (mp-number) of the compounds on the convex hull are marked in the parentheses.

| Compounds           | Space group of the lowest energy | Magnetic Ground state | Compounds on the convex hull                        | $E_{\text{hull}}$ (meV/atom) |
|---------------------|----------------------------------|-----------------------|-----------------------------------------------------|------------------------------|
| $Y_3\text{TiTiS}_7$ | $P6_3$                           | AFM1                  | $Y_2S_3$ (mp-541289)+<br>$Ti_2S_3 + \text{TiS}$     | 127.1136                     |
| $Y_3\text{TiVS}_7$  | $P6_3$                           | AFM2                  | $Y_2S_3 + Ti_2S_3 + \text{VS}$                      | 92.6394                      |
| $Y_3\text{TiCrS}_7$ | $P6_3$                           | AFM2                  | $Y_2S_3 + Ti_2S_3 + \text{CrS}$                     | 94.2864                      |
| $Y_3\text{TiMnS}_7$ | $P6_3$                           | AFM2                  | $Y_2S_3 + Ti_2S_3 + \text{MnS}$                     | 79.0006                      |
| $Y_3\text{TiFeS}_7$ | $P6_3$                           | AFM2                  | $Y_2S_3 + Ti_2S_3 + \text{FeS}$                     | 117.7677                     |
| $Y_3\text{TiCoS}_7$ | $P6_3$                           | AFM2                  | $Y_2S_3 + Ti_2S_3 + \text{CoS}$                     | 95.5547                      |
| $Y_3\text{TiNiS}_7$ | $P6_3$                           | AFM1                  | $Y_2S_3 + Ti_2S_3 + \text{NiS}$                     | 78.9549                      |
| $Y_3\text{TiCuS}_7$ | $P6_3$                           | FM                    | $Y_2S_3 + Ti_2S_3 + \text{CuS}$                     | 5.7233                       |
| $Y_3\text{VTiS}_7$  | $P6_3$                           | AFM1                  | $Y_2S_3 + V_3S_4$ (mp-799) +<br>$VS_2 + \text{TiS}$ | 120.1466                     |
| $Y_3\text{VVS}_7$   | $P6_3$                           | AFM2                  | $Y_2S_3 + V_3S_4 + VS_2 +$<br>$VS$                  | 76.7273                      |
| $Y_3\text{VCrS}_7$  | $P6_3$                           | AFM2                  | $Y_2S_3 + V_3S_4 + VS_2$<br>$+ \text{CrS}$          | 84.5787                      |
| $Y_3\text{VMnS}_7$  | $P6_3$                           | AFM2                  | $Y_2S_3 + V_3S_4 + VS_2$<br>$+ \text{MnS}$          | 68.2859                      |
| $Y_3\text{VFeS}_7$  | $P6_3$                           | AFM1                  | $Y_2S_3 + V_3S_4 + VS_2 +$<br>$\text{FeS}$          | 139.5178                     |
| $Y_3\text{VCoS}_7$  | $P6_3$                           | FM                    | $Y_2S_3 + V_3S_4 + VS_2 +$<br>$\text{CoS}$          | 124.4004                     |

|              |        |      |                                |          |
|--------------|--------|------|--------------------------------|----------|
| $Y_3VNiS_7$  | $P6_3$ | AFM1 | $Y_2S_3 + V_3S_4 + VS_2 + NiS$ | 95.3705  |
| $Y_3VCuS_7$  | $P6_3$ | FM   | $Y_2S_3 + V_3S_4 + VS_2 + CuS$ | 46.0255  |
| $Y_3CrTiS_7$ | $P6_3$ | AFM1 | $Y_2S_3 + Cr_2S_3 + TiS$       | 118.7115 |
| $Y_3CrVS_7$  | $P6_3$ | AFM2 | $Y_2S_3 + Cr_2S_3 + VS$        | 82.5292  |
| $Y_3CrCrS_7$ | $Pbam$ | AFM1 | $Y_2S_3 + Cr_2S_3 + CrS$       | 70.9144  |
| $Y_3CrMnS_7$ | $P6_3$ | AFM2 | $Y_2S_3 + Cr_2S_3 + MnS$       | 72.4296  |
| $Y_3CrFeS_7$ | $P6_3$ | AFM1 | $Y_2S_3 + Cr_2S_3 + FeS$       | 143.5902 |
| $Y_3CrCoS_7$ | $P6_3$ | FM   | $Y_2S_3 + Cr_2S_3 + CoS$       | 130.8638 |
| $Y_3CrNiS_7$ | $P6_3$ | FM   | $Y_2S_3 + Cr_2S_3 + NiS$       | 120.6573 |
| $Y_3CrCuS_7$ | $P6_3$ | FM   | $Y_2S_3 + Cr_2S_3 + CuS$       | 50.8652  |
| $Y_3MnTiS_7$ | $P6_3$ | AFM1 | $Y_2S_3 + Mn_2S_3 + TiS$       | -8.7743  |
| $Y_3MnVS_7$  | $P6_3$ | FM   | $Y_2S_3 + Mn_2S_3 + VS$        | 26.4943  |
| $Y_3MnCrS_7$ | $P6_3$ | AFM2 | $Y_2S_3 + Mn_2S_3 + CrS$       | -11.3827 |
| $Y_3MnMnS_7$ | $P6_3$ | AFM2 | $Y_2S_3 + Mn_2S_3 + MnS$       | 36.2013  |
| $Y_3MnFeS_7$ | $P6_3$ | AFM1 | $Y_2S_3 + Mn_2S_3 + FeS$       | 94.3493  |
| $Y_3MnCoS_7$ | $P6_3$ | AFM2 | $Y_2S_3 + Mn_2S_3 + CoS$       | 82.3617  |
| $Y_3MnNiS_7$ | $P6_3$ | FM   | $Y_2S_3 + Mn_2S_3 + NiS$       | 100.9952 |
| $Y_3MnCuS_7$ | $P6_3$ | FM   | $Y_2S_3 + Mn_2S_3 + CuS$       | 55.1221  |
| $Y_3FeTiS_7$ | $P6_3$ | AFM1 | $La_2S_3 + FeS_2 + FeS + TiS$  | 88.9613  |

---

|              |        |      |                                   |          |
|--------------|--------|------|-----------------------------------|----------|
| $Y_3FeVS_7$  | $P6_3$ | AFM2 | $La_2S_3 + FeS_2 + FeS + VS$      | 61.7225  |
| $Y_3FeCrS_7$ | $P6_3$ | AFM2 | $La_2S_3 + FeS_2 + FeS + CrS$     | 47.3885  |
| $Y_3FeMnS_7$ | $P6_3$ | AFM2 | $La_2S_3 + FeS_2 + FeS + MnS$     | 61.1164  |
| $Y_3FeFeS_7$ | $P6_3$ | AFM2 | $Y_2S_3 + FeS_2 + FeS$            | 128.1123 |
| $Y_3FeCoS_7$ | $P6_3$ | AFM1 | $La_2S_3 + FeS_2 + FeS + CoS$     | 123.6594 |
| $Y_3FeNiS_7$ | $P6_3$ | AFM2 | $La_2S_3 + FeS_2 + FeS + NiS$     | 126.2750 |
| $Y_3FeCuS_7$ | $P6_3$ | FM   | $La_2S_3 + FeS_2 + FeS + CuS$     | 99.7375  |
| $Y_3CoTiS_7$ | $P6_3$ | AFM1 | $La_2S_3 + Co_2S_3 + TiS$         | 35.9428  |
| $Y_3CoVS_7$  | $P6_3$ | AFM1 | $La_2S_3 + Co_2S_3 + VS$          | 68.3576  |
| $Y_3CoCrS_7$ | $P6_3$ | AFM2 | $La_2S_3 + Co_2S_3 + CrS$         | 30.7807  |
| $Y_3CoMnS_7$ | $P6_3$ | AFM2 | $La_2S_3 + Co_2S_3 + MnS$         | 80.7309  |
| $Y_3CoFeS_7$ | $P6_3$ | FM   | $La_2S_3 + Co_2S_3 + FeS$         | 136.7441 |
| $Y_3CoCoS_7$ | $P6_3$ | AFM2 | $Y_2S_3 + Co_2S_3 + CoS$          | 122.9027 |
| $Y_3CoNiS_7$ | $P6_3$ | FM   | $La_2S_3 + Co_2S_3 + NiS$         | 175.3139 |
| $Y_3CoCuS_7$ | $P6_3$ | FM   | $La_2S_3 + Co_2S_3 + CuS$         | 118.1625 |
| $Y_3NiTiS_7$ | $P6_3$ | AFM1 | $La_2S_3 + Ni_3S_4 + NiS_2 + TiS$ | 89.6707  |
| $Y_3NiVS_7$  | $P6_3$ | AFM1 | $La_2S_3 + Ni_3S_4 + NiS_2 + VS$  | 67.0390  |
| $Y_3NiCrS_7$ | $P6_3$ | AFM2 | $La_2S_3 + Ni_3S_4 + NiS_2 + CrS$ | 55.3778  |
| $Y_3NiMnS_7$ | $P6_3$ | AFM2 | $La_2S_3 + Ni_3S_4 + NiS_2 + MnS$ | 99.4790  |
| $Y_3NiFeS_7$ | $P6_3$ | AFM1 | $La_2S_3 + Ni_3S_4 + NiS_2 + FeS$ | 153.0025 |

|                            |        |      |                                                                                   |          |
|----------------------------|--------|------|-----------------------------------------------------------------------------------|----------|
| $\text{Y}_3\text{NiCoS}_7$ | $P6_3$ | AFM1 | $\text{La}_2\text{S}_3 + \text{Ni}_3\text{S}_4 + \text{NiS}_2 + \text{CoS}$       | 143.7661 |
| $\text{Y}_3\text{NiNiS}_7$ | $Pbam$ | AFM1 | $\text{Y}_2\text{S}_3 + \text{Ni}_3\text{S}_4 + \text{NiS}_2 + \text{NiS}$        | 108.6439 |
| $\text{Y}_3\text{NiCuS}_7$ | $P6_3$ | AFM2 | $\text{Y}_2\text{S}_3 + \text{Ni}_3\text{S}_4 + \text{NiS}_2 + \text{CuS}$        | 153.6791 |
| $\text{Y}_3\text{CuTiS}_7$ | $P6_3$ | AFM1 | $\text{Y}_2\text{S}_3 + \text{CuS}_2(\text{mp-849086}) + \text{CuS} + \text{TiS}$ | -37.7696 |
| $\text{Y}_3\text{CuVS}_7$  | $P6_3$ | FM   | $\text{Y}_2\text{S}_3 + \text{CuS}_2 + \text{CuS} + \text{VS}$                    | 36.2281  |
| $\text{Y}_3\text{CuCrS}_7$ | $P6_3$ | AFM2 | $\text{Y}_2\text{S}_3 + \text{CuS}_2 + \text{CuS} + \text{CrS}$                   | 2.1575   |
| $\text{Y}_3\text{CuMnS}_7$ | $P6_3$ | AFM2 | $\text{Y}_2\text{S}_3 + \text{CuS}_2 + \text{CuS} + \text{MnS}$                   | 46.5348  |
| $\text{Y}_3\text{CuFeS}_7$ | $P6_3$ | AFM1 | $\text{Y}_2\text{S}_3 + \text{CuS}_2 + \text{CuS} + \text{FeS}$                   | 106.7750 |
| $\text{Y}_3\text{CuCoS}_7$ | $P6_3$ | FM   | $\text{Y}_2\text{S}_3 + \text{CuS}_2 + \text{CuS} + \text{CoS}$                   | 92.8461  |
| $\text{Y}_3\text{CuNiS}_7$ | $P6_3$ | FM   | $\text{Y}_2\text{S}_3 + \text{CuS}_2 + \text{CuS} + \text{NiS}$                   | 119.4819 |
| $\text{Y}_3\text{CuCuS}_7$ | $Pbam$ | AFM1 | $\text{Y}_2\text{S}_3 + \text{CuS}_2 + \text{CuS}$                                | 120.5423 |

---

## References

1. N. Rodier and P. Laruelle, *Bulletin de Minéralogie*, 1972, **95**, 548-552.
2. M. Ribes, J. Olivier-Fourcade, E. Philippot and M. Maurin, *J. Solid. State. Chem.*, 1973, **8**, 195-205.
3. S. Jaulmes and M. Julien-Pouzol, *Acta. Crystallogr.*, 1977, **33**, 3898-3899.
4. M. Saeki, Y. Yajima and M. Onoda, *J. Solid. State. Chem.*, 1991, **92**, 286-294.
5. S. Niu, D. Sarkar, K. W. Williams, Y. Zhou, Y. Li, E. Bianco, H. Huyan, S. B. Cronin, M. E. McConney, R. Haiges, R. Jaramillo, D. J. Singh, W. A. Tisdale, R. Kapadia and J. Ravichandran, *Chem. Mater.*, 2018, **30**, 4882-4886.
6. B. Chen, B. W. Eichhorn and W. Wong-Ng, *Acta. Crystallogr.*, 1994, **50**, 161-164.
7. T. Murugesan, S. Ramesh, J. Gopalakrishnan and C. N. Rao, *J. Solid. State. Chem.*, 1981, **38**, 165-172.
8. K. S. Nanjundaswamy and J. Gopalakrishnan, *J. Solid. State. Chem.*, 1983, **49**, 51-58.
9. R. Plumier, M. Lecomte, G. Collin and F. Keller-Besrest, *Phy. Lett. A*, 1980, **76**, 419-420.
10. S. J. Hwu, C. K. Bucher, J. Carpenter and S. P. Taylor, *Inorg. Chem.*, 1995, **34**, 1979-1980.
11. K. M. Poduska, F. J. Disalvo, K. Min and P. S. Halasyamani, *J. Alloys. Compd.*, 2002, **335**, L5-L9.
12. M. Guittard, *Bull. Soc. Chim. Fr.*, 1970, **7**, 2467-2469.



13. L. D. Gulay, I. D. Olekseyuk, M. Wołczyrz and J. Stępień-Damm, *Z. Anorg. Allg. Chem.*, 2005, **631**, 1919-1923.
14. L. Wu and F. Q. Huang, *Z. Krist-New Cryst. St.*, 2005, **220**, 327-328.
15. H. Zeng, F. Zheng, G. Guo and J. Huang, *J. Alloys. Compd.*, 2008, **458**, 123-129.
16. B. W. Rudyk, S. S. Stoyko and A. O. Oliynyk, *J. Solid. State. Chem.*, 2014, **210**, 79-88.
17. A. K. Iyer, B. W. Rudyk, X. Lin, H. Singh, A. Z. Sharma, C. R. Wiebe, C. R. Wiebe, ;C. R. Wiebe and A. Mar, *J. Solid. State. Chem.*, 2015, **229**, 150-159.
18. B. W. Rudyk and S. S. Stoyko, *J. Solid. State. Chem.*, 2013, **208**, 78-85.
19. A. Daoudi, ;M. Lamire, J. C. Levet and H. Noël, *J. Solid. State. Chem.*, 1996, **123**, 331-336.
20. L. D. Gulay, V. Y. Shemet and I. D. Olekseyuk, *J. Alloys. Compd.*, 2005, **388**, 59-64.
21. L. D. Gulay, O. S. Lychmanyuk, J. Stępień-Damm, A. Pietraszko and I. D. Olekseyuk, *J. Alloys. Compd.*, 2005, **402**, 201-203.
22. L. D. Gulay, O. S. Lychmanyuk, J. Stępień-Damm, A. Pietraszko and I. D. Olekseyuk, *J. Alloys. Compd.*, 2006, **414**, 113-117.
23. I. Hartenbach and T. Schleid, *J. Solid. State. Chem.*, 2003, **171**, 382-386.
24. L. D. Gulay, O. S. Lychmanyuk, M. Wołczyrz, A. Pietraszko and I. D. Olekseyuk, *J. Alloys. Compd.*, 2006, **425**, 159-163.
25. O. M. Strok, M. Daszkiewicz, L. D. Gulay and D. Kaczorowski, *J. Alloys. Compd.*, 2010, **493**, 47-49.

26. O. S. Lychmanyuk, L. D. Gulay, I. D. Olekseyuk, J. Stępień-Damm, M. Daszkiewicz and A. Pietraszko, *Pol. J. Chem.*, 2007, **81**, 353-357.
27. L. D. Gulay, O. S. Lychmanyuk, I. D. Olekseyuk, M. Daszkiewicz, J. Stępień-Damm and A. Pietraszko, *J. Alloys. Compd.*, 2007, **431**, 185-190.
28. I. Hartenbach, T. Nilges and T. Schleid, *Z. Anorg. Allg. Chem.*, 2007, **633**, 2445-2452.
29. I. Hartenbach, A. Müller and T. Schleid, *Z. Anorg. Allg. Chem.*, 2006, **632**, 2147-2147.
30. A. Choudhury and P. K. Dorhout, *Inorg. Chem.*, 2015, **54**, 1055-1065.
